# Supplementary material for: Lack of nAChR Activity Depresses Cochlear Maturation and Up-Regulates GABA System Components: Temporal Profiling of Gene Expression in α9 Null Mice
Source: PLoS One. 2010 Feb 4;5(2):e9058. doi: 10.1371/journal.pone.0009058 (PMC2816210; doi:10.1371/journal.pone.0009058)
Supplement: Table S2 — Intersection of differentially expressed genes at P13 and P60. Intersection of differentially expressed genes at P13 and P60 along with their fold changes. Adjusted p-values<0.05, absolute fold changes >1.5. (0.06 MB PDF) [file pone.0009058.s003.pdf]

Table S2 - Intersection of differentially expressed genes at P13 and P60

| Probe ID     | Fold Change (log2)<br>P13 | P60      | Gene Symbol   | Gene Description                                                                          |
|--------------|---------------------------|----------|---------------|-------------------------------------------------------------------------------------------|
| 1415784_at   | 3.433059                  | 2.321088 | Vps35         | vacuolar protein sorting 35                                                               |
| 1415801_at   | 4.101195                  | 2.601822 | Gja1          | gap junction protein, alpha 1                                                             |
| 1415823_at   | 5.406224                  | 2.913104 | Scd2          | stearoyl-Coenzyme A desaturase 2                                                          |
| 1415824_at   | 4.00198                   | 2.915696 | Scd2          | stearoyl-Coenzyme A desaturase 2                                                          |
| 1415893_at   | 2.817963                  | 1.898136 | Sgpl1         | sphingosine phosphate lyase 1                                                             |
| 1415957_a_at | 3.141059                  | 1.691971 | Rrp1          | ribosomal RNA processing 1 homolog (S. cerevisiae)                                        |
| 1415997_at   | 3.240269                  | 1.855701 | Txnip         | thioredoxin interacting protein                                                           |
| 1416190_a_at | 3.895035                  | 1.727618 | Sec61a1       | Sec61 alpha 1 subunit (S. cerevisiae)                                                     |
| 1416484_at   | 3.221754                  | 1.700582 | Ttc3          | tetratricopeptide repeat domain 3                                                         |
| 1416525_at   | 3.607463                  | 2.189889 | Spop          | speckle-type POZ protein                                                                  |
| 1416959_at   | 2.546208                  | 2.412899 | Nr1d2         | nuclear receptor subfamily 1, group D, member 2                                           |
| 1416986_a_at | 1.693842                  | 1.637361 | Sirpa         | signal-regulatory protein alpha                                                           |
| 1417029_a_at | 2.513678                  | 1.815466 | Trim2         | tripartite motif-containing 2                                                             |
| 1417069_a_at | 4.147902                  | 2.753739 | Gmfb          | glia maturation factor, beta                                                              |
| 1417502_at   | 3.387392                  | 2.276252 | Tspan7        | tetraspanin 7                                                                             |
| 1418020_s_at | 3.267313                  | 1.879499 | Cpd           | carboxypeptidase D                                                                        |
| 1418292_at   | 2.48026                   | 1.686748 | Asna1         | arsA arsenite transporter, ATP-binding, homolog 1 (bacterial)                             |
| 1418452_at   | 2.195641                  | 1.894159 | Gng2          | guanine nucleotide binding protein (G protein), gamma 2                                   |
| 1418768_at   | 1.530035                  | 1.834519 | Opa1          | optic atrophy 1 homolog (human)                                                           |
| 1419098_at   | 3.434734                  | 1.835479 | Stom          | stomatin                                                                                  |
| 1419099_x_at | 3.303005                  | 1.9617   | Stom          | stomatin                                                                                  |
| 1420506_a_at | 2.144152                  | 2.129219 | Stxbp1        | syntaxin binding protein 1                                                                |
| 1420610_at   | 3.021126                  | 2.518742 | Prkacb        | protein kinase, cAMP dependent, catalytic, beta                                           |
| 1420816_at   | 2.268115                  | 2.343326 | Ywhag         | tyrosine 3-monooxygenase/tryptophan 5-monooxygenase activation protein, gamma polypeptide |
| 1420867_at   | 3.312996                  | 1.83774  | Tmed2         | transmembrane emp24 domain trafficking protein 2                                          |
| 1420901_a_at | 3.984849                  | 1.724831 | Hk1           | hexokinase 1                                                                              |
| 1420924_at   | 3.578872                  | 1.680721 | Timp2         | tissue inhibitor of metalloproteinase 2                                                   |
| 1420948_s_at | 2.931337                  | 2.756593 | Atrx          | alpha thalassemia/mental retardation syndrome X-linked homolog (human)                    |
| 1420951_a_at | 3.11349                   | 2.063684 | Son           | Son DNA binding protein                                                                   |
| 1420975_at   | 3.209455                  | 2.189343 | Baz1b         | bromodomain adjacent to zinc finger domain, 1B                                            |
| 1421013_at   | 1.954613                  | 1.82984  | Pitpnb        | phosphatidylinositol transfer protein, beta                                               |
| 1421070_at   | 2.59621                   | 2.072055 | D3ErtD300e    | DNA segment, Chr 3, ERATO Doi 300, expressed                                              |
| 1421102_a_at | 2.69399                   | 1.767351 | Vamp3         | vesicle-associated membrane protein 3                                                     |
| 1421606_a_at | 2.414538                  | 1.606752 | Sult4a1       | sulfotransferase family 4A, member 1                                                      |
| 1421832_at   | 2.87429                   | 1.757248 | Twsg1         | twisted gastrulation homolog 1 (Drosophila)                                               |
| 1421851_at   | 3.883313                  | 2.260612 | Mtap1b        | microtubule-associated protein 1B                                                         |
| 1421862_a_at | 2.439096                  | 1.938734 | Vamp1         | vesicle-associated membrane protein 1                                                     |
| 1421866_at   | 2.829756                  | 2.509237 | Nr3c1         | nuclear receptor subfamily 3, group C, member 1                                           |
| 1421955_a_at | 3.319549                  | 2.228188 | Nedd4         | neural precursor cell expressed, developmentally down-regulated 4                         |
| 1421990_at   | 1.529026                  | 3.08988  | Syt1          | synaptotagmin I                                                                           |
| 1422009_at   | 3.29081                   | 1.810695 | Atp1b2        | ATPase, Na+/K+ transporting, beta 2 polypeptide                                           |
| 1422017_s_at | 2.250677                  | 1.658762 | 4833439L19Rik | RIKEN cDNA 4833439L19 gene                                                                |
| 1422249_s_at | 2.461006                  | 1.726582 | Zfa           | zinc finger protein, autosomal                                                            |
| 1422959_s_at | 2.40897                   | 1.610084 | Zfp313        | ring finger protein 114                                                                   |
| 1422966_a_at | 2.005324                  | 1.783075 | Tfrc          | transferrin receptor                                                                      |
| 1422967_a_at | 3.44129                   | 1.669243 | Tfrc          | transferrin receptor                                                                      |
| 1423325_at   | 2.922166                  | 1.837624 | Pnn           | pinin                                                                                     |
| 1423598_at   | 1.839129                  | 1.722407 | Atp8a1        | ATPase, aminophospholipid transporter (APLT), class I, type 8A, member 1                  |
| 1425338_at   | 1.931654                  | 2.156073 | Plcb4         | phospholipase C, beta 4                                                                   |
| 1425461_at   | 2.579796                  | 1.936184 | Fbxw11        | F-box and WD-40 domain protein 11                                                         |
| 1425467_a_at | 2.762797                  | 1.827791 | Plp1          | proteolipid protein (myelin) 1                                                            |
| 1425487_at   | 2.418868                  | 1.7061   | Slu7          | SLU7 splicing factor homolog (S. cerevisiae)                                              |
| 1425539_a_at | 2.339107                  | 1.652486 | Rtn3          | reticulon 3                                                                               |

|              |           |           |               |                                                                              |
|--------------|-----------|-----------|---------------|------------------------------------------------------------------------------|
| 1425576_at   | 2.976323  | 2.300633  | Ahcy1         | S-adenosylhomocysteine hydrolase-like 1                                      |
| 1425911_a_at | 4.294646  | 1.767592  | Fgfr1         | fibroblast growth factor receptor 1                                          |
| 1427058_at   | 2.40955   | 2.108888  | Eif4a1        | eukaryotic translation initiation factor 4A1                                 |
| 1427470_s_at | 3.166934  | 1.930992  | Napb          | N-ethylmaleimide sensitive fusion protein attachment protein beta            |
| 1428820_at   | 2.640228  | 1.669406  | Mapre1        | microtubule-associated protein, RP/EB family, member 1                       |
| 1428888_at   | 2.043293  | 1.648453  | Tmem33        | transmembrane protein 33                                                     |
| 1430533_a_at | 3.983495  | 1.9611    | Ctnnb1        | catenin (cadherin associated protein), beta 1                                |
| 1430692_a_at | 2.275132  | 1.680689  | Sel1l         | sel-1 suppressor of lin-12-like (C. elegans)                                 |
| 1430980_a_at | 4.520959  | 2.95185   | Eif4a1        | eukaryotic translation initiation factor 4A1                                 |
| 1430981_s_at | 3.514609  | 2.096159  | Gbbp1         | GC-rich promoter binding protein 1                                           |
| 1430984_at   | 2.257294  | 1.957925  | Azin1         | antizyme inhibitor 1                                                         |
| 1430996_at   | 2.130542  | 2.000058  | Etnk1         | ethanolamine kinase 1                                                        |
| 1431030_a_at | 4.433675  | 2.725354  | Rnf14         | ring finger protein 14                                                       |
| 1431216_s_at | 1.579359  | 1.987764  | Dnajc6        | DnaJ (Hsp40) homolog, subfamily C, member 6                                  |
| 1431233_at   | 2.93336   | 1.688964  | Cnnm4         | cyclin M4                                                                    |
| 1431606_a_at | 2.867901  | 2.099579  | Angel2        | angel homolog 2 (Drosophila)                                                 |
| 1431686_a_at | 3.917631  | 2.584548  | Gmfb          | glia maturation factor, beta                                                 |
| 1432344_a_at | 2.20097   | 1.937626  | Aplp2         | amyloid beta (A4) precursor-like protein 2                                   |
| 1433492_at   | 2.902238  | 1.74905   | Epb4.1l2      | erythrocyte protein band 4.1-like 2                                          |
| 1433515_s_at | 3.442424  | 2.446707  | Etnk1         | ethanolamine kinase 1                                                        |
| 1433804_at   | 3.063185  | 1.825171  | Jak1          | Janus kinase 1                                                               |
| 1434106_at   | 3.012675  | 2.049006  | Epm2a1p1      | EPM2A (laforin) interacting protein 1                                        |
| 1434357_a_at | 3.246418  | 1.745137  | Kpnb1         | karyopherin (importin) beta 1                                                |
| 1435635_at   | 2.989369  | 2.232329  | Pcmdt1        | protein-L-isoaspartate (D-aspartate) O-methyltransferase domain containing 1 |
| 1436706_at   | 2.555032  | 1.720037  | Tmem32        | transmembrane protein 32                                                     |
| 1436858_at   | 3.546539  | 1.737685  | Mbnl2         | muscleblind-like 2                                                           |
| 1438556_a_at | 2.45016   | 1.987141  | Tmod3         | tropomodulin 3                                                               |
| 1438714_at   | 1.731712  | 2.136938  | Zfp207        |                                                                              |
| 1439151_at   | 2.388456  | 1.725848  | Msrb3         | methionine sulfoxide reductase B3                                            |
| 1439305_at   | 2.263026  | 1.672706  |               |                                                                              |
| 1439517_at   | 2.667241  | 2.085226  | Mysm1         |                                                                              |
| 1440862_at   | 1.552168  | 1.641955  |               |                                                                              |
| 1442019_at   | 3.92711   | 3.01256   | Rcvrn         |                                                                              |
| 1443728_at   | 2.699002  | 1.8324    |               |                                                                              |
| 1444001_at   | 3.280561  | 2.437371  | Strbp         |                                                                              |
| 1447360_at   | 4.972183  | 4.418096  | Tsc22d1       | TSC22 domain family, member 1                                                |
| 1448183_a_at | 2.857963  | 2.333977  | Hif1a         | hypoxia inducible factor 1, alpha subunit                                    |
| 1448285_at   | 2.492461  | 2.255611  | Rgs4          | regulator of G-protein signaling 4                                           |
| 1448348_at   | 2.966815  | 2.025491  | Caprin1       | cell cycle associated protein 1                                              |
| 1448458_at   | 3.188629  | 1.889407  | Top2b         | topoisomerase (DNA) II beta                                                  |
| 1448538_a_at | 4.253041  | 1.847343  | D4Wsu53e      | DNA segment, Chr 4, Wayne State University 53, expressed                     |
| 1448541_at   | 3.872011  | 2.552021  | Klc1          | kinesin light chain 1                                                        |
| 1449054_a_at | 2.966922  | 1.959988  | Pcbp4         | poly(rC) binding protein 4                                                   |
| 1449262_s_at | 2.100273  | 1.715523  | Lin7c         | lin-7 homolog C (C. elegans)                                                 |
| 1449264_at   | 2.94458   | 2.105196  | Syt11         | synaptotagmin XI                                                             |
| 1449682_s_at | 2.481223  | 2.226367  | Tubb2b        | tubulin, beta 2a, pseudogene 2                                               |
| 1449931_at   | 2.242467  | 2.205036  | Cpeb4         | cytoplasmic polyadenylation element binding protein 4                        |
| 1450007_at   | 2.757845  | 1.761852  | 1500003O03Rik | RIKEN cDNA 1500003O03 gene                                                   |
| 1450037_at   | 2.958919  | 2.248753  | Usp9x         | ubiquitin specific peptidase 9, X chromosome                                 |
| 1450038_s_at | 2.505561  | 1.915591  | Usp9x         | ubiquitin specific peptidase 9, X chromosome                                 |
| 1450108_at   | 2.244475  | 1.654364  | Kif1a         | kinesin family member 1A                                                     |
| 1450208_a_at | 1.840287  | 1.781292  | Elmo1         | engulfment and cell motility 1, ced-12 homolog (C. elegans)                  |
| 1450291_s_at | -1.812101 | -1.620883 | Ms4a4c        | membrane-spanning 4-domains, subfamily A, member 4C                          |
| 1450379_at   | 3.792238  | 2.252815  | Msn           | moesin                                                                       |
| 1450392_at   | 3.477232  | 1.793951  | Abca1         | ATP-binding cassette, sub-family A (ABC1), member 1                          |
| 1450846_at   | 2.473852  | 1.85175   | Bzw1          | basic leucine zipper and W2 domains 1                                        |
| 1451285_at   | 4.123669  | 2.573944  | Fus           | fusion, derived from t(12;16) malignant liposarcoma (human)                  |

|                              |          |          |               |                                                                   |
|------------------------------|----------|----------|---------------|-------------------------------------------------------------------|
| 1451846_at                   | 3.178015 | 1.906572 | Nebi          | nebullette                                                        |
| 1451961_a_at                 | 5.844186 | 2.796962 | Mbp           | myelin basic protein                                              |
| 1452030_a_at                 | 2.984259 | 1.683975 | Hnmpr         | heterogeneous nuclear ribonucleoprotein R                         |
| 1452308_a_at                 | 3.267716 | 1.987681 | Atp1a2        | ATPase, Na+/K+ transporting, alpha 2 polypeptide                  |
| 1452427_s_at                 | 2.864206 | 1.636373 | Ptplad1       | protein tyrosine phosphatase-like A domain containing 1           |
| 1452444_at                   | 2.968607 | 2.301508 | Napb          | N-ethylmaleimide sensitive fusion protein attachment protein beta |
| 1452638_s_at                 | 3.117866 | 2.711231 | Dnm1l         | dynamitin 1-like                                                  |
| 1452688_at                   | 1.695354 | 1.726259 | Prpf39        | PRP39 pre-mRNA processing factor 39 homolog (yeast)               |
| 1452806_at                   | 2.46267  | 1.663138 | 1500016O10Rik | RIKEN cDNA 1500016O10 gene                                        |
| 1453163_at                   | 2.412696 | 1.680639 | Ppp1r12a      | protein phosphatase 1, regulatory (inhibitor) subunit 12A         |
| 1453307_a_at                 | 3.823676 | 1.863647 | Anapc5        | anaphase-promoting complex subunit 5                              |
| 1453740_a_at                 | 4.213176 | 1.790344 | Ccnl2         | cyclin L2                                                         |
| 1453760_at                   | 2.617526 | 2.151796 | Mier1         | mesoderm induction early response 1 homolog (Xenopus laevis)      |
| 1453960_a_at                 | 2.994733 | 1.849085 | Capzb         | capping protein (actin filament) muscle Z-line, beta              |
| 1453988_a_at                 | 2.871974 | 1.644895 | Ide           | insulin degrading enzyme                                          |
| 1454174_a_at                 | 1.818308 | 1.700105 | C330007P06Rik | RIKEN cDNA C330007P06 gene                                        |
| 1455986_at                   | 2.145313 | 1.745366 | Zdhhc17       | zinc finger, DHHC domain containing 17                            |
| 1456080_a_at                 | 4.937984 | 2.481565 | Serinc3       | serine incorporator 3                                             |
| 1456088_at                   | 2.458152 | 1.792742 | Xiap          | X-linked inhibitor of apoptosis                                   |
| 1456386_at                   | 3.010843 | 1.647867 | Rbm39         |                                                                   |
| 1456398_at                   | 2.774336 | 1.665971 | Tug1          | taurine upregulated gene 1                                        |
| 1456610_at                   | 2.887038 | 1.998251 | Jmjd3         | jumonji domain containing 3                                       |
| 1456827_at                   | 2.290211 | 1.649953 | Zfp87         | zinc finger protein 87                                            |
| 1458676_at                   | 3.844988 | 2.762408 | Nktr          | natural killer tumor recognition sequence                         |
| 1460241_a_at                 | 2.990871 | 1.810792 | St3gal5       | ST3 beta-galactoside alpha-2,3-sialyltransferase 5                |
| 1460279_a_at                 | 3.9904   | 1.764153 | Gtf2i         | general transcription factor II I                                 |
| 1460295_s_at                 | 2.958201 | 1.994436 | Il6st         | interleukin 6 signal transducer                                   |
| 1460650_at                   | 1.986057 | 1.894885 | Atp6v0a1      | ATPase, H+ transporting, lysosomal V0 subunit A1                  |
| 1460717_at                   | 2.45665  | 1.663754 | Tspyl1        | testis-specific protein, Y-encoded-like 1                         |
| AFFX-b-ActinMur/M12481_5_at  | 3.435492 | 1.934098 | Actb          | actin, beta                                                       |
| AFFX-GapdhMur/M32599_5_at    | 5.34447  | 2.673308 | Gapdh         | glyceraldehyde-3-phosphate dehydrogenase                          |
| AFFX-TransRecMur/X57349_3_at | 1.993207 | 1.717723 | Tfrc          | transferrin receptor                                              |
